# Supplementary material for: Glutathione de novo synthesis but not recycling process coordinates with glutamine catabolism to control redox homeostasis and directs murine T cell differentiation
Source: eLife journal article supplement (doi:10.7554/elife.36158), 2018-09-10
Supplement: supp [file elife-36158-supp-v1.zip]

Archive with 19 entries (19 files):
- elife_poa_e36158_Figure_5_figure_supplement_1.pdf
- elife_poa_e36158_Figure_4_figure_supplement_1_source_data_1.xlsx
- elife_poa_e36158_Supplementary_File_1.xlsx
- elife_poa_e36158_Figure_2_figure_supplement_1.pdf
- elife_poa_e36158_Figure_3_figure_supplement_1.pdf
- elife_poa_e36158_Figure_1_figure_supplement_1.pdf
- elife_poa_e36158_Figure_6_figure_supplement_1_source_data_1.xlsx
- elife_poa_e36158_Figure_6_source_data_1.xlsx
- elife_poa_e36158_Figure_1_source_data_1.xlsx
- elife_poa_e36158_Figure_1_figure_supplement_1_source_data_1.xlsx
- elife_poa_e36158_Figure_5_source_data_1.xlsx
- elife_poa_e36158_Figure_4_source_data_1.xlsx
- elife_poa_e36158_Figure_3_figure_supplement_1_source_data_1.xlsx
- elife_poa_e36158_Figure_4_figure_supplement_1.pdf
- elife_poa_e36158_Figure_3_source_data_1.xlsx
- elife_poa_e36158_Transparent_Reporting_File.pdf
- elife_poa_e36158_Figure_6_figure_supplement_2.pdf
- elife_poa_e36158_Figure_6_figure_supplement_1.pdf
- elife_poa_e36158_Figure_2_figure_supplement_1_source_data_1.xlsx
