# Supplementary material for: Glutathione de novo synthesis but not recycling process coordinates with glutamine catabolism to control redox homeostasis and directs murine T cell differentiation
Source: eLife journal article supplement (doi:10.7554/elife.36158), 2018-09-10
Supplement: supp [file elife-36158-supp-v1.zip › elife_poa_e36158_Figure_1_figure_supplement_1_source_data_1.xlsx]

## Sheet: S1A
		Original MFI
		Naïve	Active
		4930	14710
		5211	13126
		4872	15218
		5004.33
		Caluclated Value
		0.985146	2.93945
		1.0413	2.62293
		0.973556	3.04096

## Sheet: S1B
		Oiginal MFI
		Naïve	Active
		299362	844000
		320708	926000
		311063	862000
		310378
		Caclulated Vaue
		0.964509	2.71927
		1.03328	2.98346
		1.00221	2.77726

## Sheet: S1C
	Original data
	Ct Value	tub(internal control)	Gclc	Gclm	GSR	Gss
	T cell Naïve	20.6241	25.9636	27.8237	26.2179	29.7402
	T cell Naïve	20.5304	25.9721	27.9202	26.4355	29.945
	T cell Naïve	20.5102	25.9516	27.9396	26.9476	29.7912
	T cell 4hr	20.8669	25.3645	27.6192	27.3001	29.7106
	T cell 4hr	20.9423	25.4201	27.577	27.2671	29.7062
	T cell 4hr	20.9313	25.4227	27.7388	28.0259	29.7799
	T cell 12hr	20.563	24.9613	26.3104	25.7358	28.1733
	T cell 12hr	20.4366	24.861	26.1512	25.664	28.285
	T cell 12hr	20.433	24.9867	26.2804	25.8076	28.2739
	T cell 24hr	19.3792	24.0722	25.2547	24.2513	26.6158
	T cell 24hr	19.0502	24.0382	25.2089	24.1308	26.5381
	T cell 24hr	19.1874	23.9104	25.3782	24.1156	26.4975
	Calculated data
	2Exp(-Delta Delta Ct)
		tub	Gclc	Gclm	GSR	Gss
	T cell Naïve		1	1	1	1
	T cell 4hr		1.89039	1.52424	0.64227	1.3678
	T cell 12hr		1.93018	2.96851	1.64774	2.83631
	T cell 24hr		1.52224	2.40255	2.02577	3.79915
	STDEV
		tub	Gclc	Gclm	GSR	Gss
	T cell Naïve		0.0427191	0.060203	0.263073	0.0850817
	T cell 4hr		0.0685782	0.0985474	0.191793	0.0549997
	T cell 12hr		0.133148	0.2313	0.117804	0.189278
	T cell 24hr		0.19623	0.31145	0.254461	0.463037

## Sheet: S1D
Original CT value
		Actin	GSR
	WT	20.9193	28.8795
	WT	20.3464	28.9233
	WT	20.7584	28.6127
	KO	20.8915	40
	KO	20.7144	40
	KO	20.6531	40
Calculated data
2Exp(-Delta Delta Ct)
	WT	1
	GSR KO	0.000450388
STDEV
	WT	0.235659
	GSR KO	3.86491e-05
