# Supplementary material for: Glutathione de novo synthesis but not recycling process coordinates with glutamine catabolism to control redox homeostasis and directs murine T cell differentiation
Source: eLife journal article supplement (doi:10.7554/elife.36158), 2018-09-10
Supplement: supp [file elife-36158-supp-v1.zip › elife_poa_e36158_Figure_1_source_data_1.xlsx]

## Sheet: Fig 1B
	Original MFI
	WT	GCLM	WT	GCLC	WT	GSR
	3520	2530	11800	6496	8416	11900
	3510	2500	10400	5110	10600	12000
	3570	2390	10300	5147	10500	12000
	3533.33		10833.3		9838.67
	Calculated Value
	0.99632	0.716105	1.08923	0.599631	0.855458	1.2096
	0.99349	0.707614	0.96	0.471692	1.07745	1.21976
	1.01047	0.676479	0.95077	0.475108	1.06729	1.21976

## Sheet: Fig 1C
	Original MFI
	WT	GCLM	WT	GCLC	WT	GSR
	6700	20000	108000	316000	90900	165000
	7700	21100	69800	495000	137000	171000
	5810	18500	64500	459000	147000	81100
	6736.67		80766.7	423333	124967
	Calculated Value
	0.994656	2.96912	1.3372	3.91254	0.727398	1.32036
	1.14311	3.13242	0.864225	6.12882	1.0963	1.36837
	0.86253	2.74644	0.798603	5.68308	1.17632	0.648977
