# Supplementary material for: Glutathione de novo synthesis but not recycling process coordinates with glutamine catabolism to control redox homeostasis and directs murine T cell differentiation
Source: eLife journal article supplement (doi:10.7554/elife.36158), 2018-09-10
Supplement: supp [file elife-36158-supp-v1.zip › elife_poa_e36158_Figure_2_figure_supplement_1.pdf]

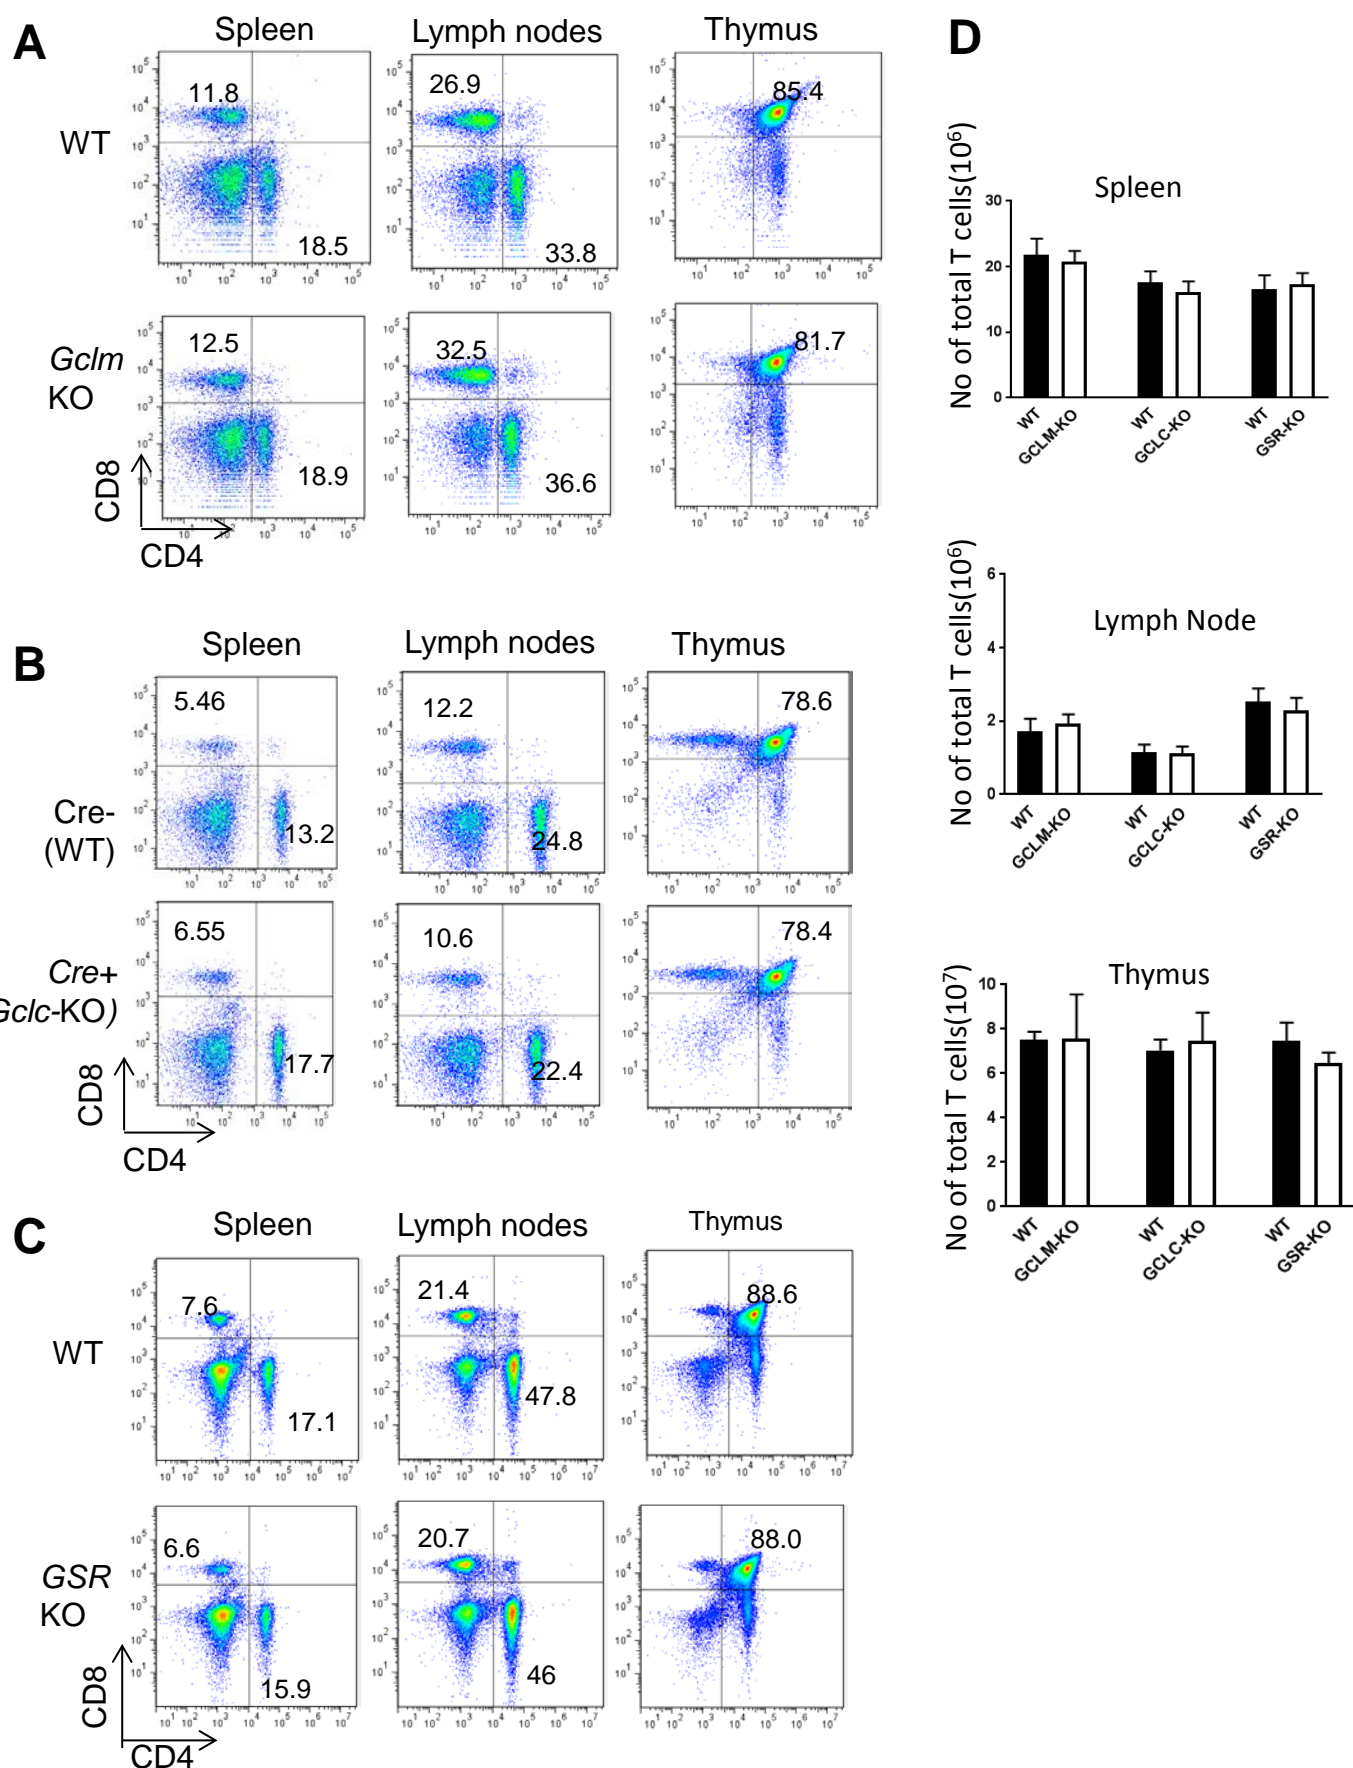

**Figure 2—figure supplement 1 . Severe depletion of GSH by blocking de novo synthesis suppresses T cell activation and proliferation.**
