# Supplementary material for: Glutathione de novo synthesis but not recycling process coordinates with glutamine catabolism to control redox homeostasis and directs murine T cell differentiation
Source: eLife journal article supplement (doi:10.7554/elife.36158), 2018-09-10
Supplement: supp [file elife-36158-supp-v1.zip › elife_poa_e36158_Figure_2_figure_supplement_1_source_data_1.xlsx]

## Sheet: S2D
			spleen	WT	GCLM-KO		WT	GCLC-KO		WT	GSR-KO
				70	62		79	59		84	90
				81	72		65	68		65	75.2
				65	64		73	72		76	78
				21.21	19.468		19.197	14.337		18.564	19.26
				24.543	22.608		15.795	16.524		14.365	16.0928
				19.695	20.096		17.739	17.496		16.796	16.692
			LN	WT	GCLM-KO		WT	GCLC-KO		WT	GSR-KO
				2.3	3.1		2.4	3.1		3.8	4
				3.4	2.4		3	2.5		3.1	3.1
				3.1	2.9		2.1	2.3		4.1	3.1
				1.3547	2.1452		1.1016	1.3299		2.6296	2.688
				2.0026	1.6608		1.377	1.0725		2.1452	2.0832
				1.8259	2.0068		0.9639	0.9867		2.8372	2.0832
			thymus	WT	GCLM-KO		WT	GCLC-KO		WT	GSR-KO
				8.7	12		9.5	11.2		7.4	6.8
				8.5	8.5		8.3	7.9		8.7	7.9
				9.3	7.3		9.2	9.6		9.2	7.3
				7.4124	9.804		7.429	8.736		6.5564	5.984
				7.242	6.9445		6.4906	6.162		7.7082	6.952
				7.9236	5.9641		7.1944	7.488		8.1512	6.424
