# Supplementary material for: Glutathione de novo synthesis but not recycling process coordinates with glutamine catabolism to control redox homeostasis and directs murine T cell differentiation
Source: eLife journal article supplement (doi:10.7554/elife.36158), 2018-09-10
Supplement: supp [file elife-36158-supp-v1.zip › elife_poa_e36158_Figure_3_figure_supplement_1_source_data_1.xlsx]

## Sheet: S3C
		Original MFI
		Complete	5mM NAC
		24200	5865
		23800	5845
		26500	5512
		24833.3
		Caluclated Value
		0.974497	0.236175
		0.958389	0.235369
		1.06711	0.22196

## Sheet: S3D
			Original MFI
			Complete	5mM NAC
			36100	33500
			36400	26800
			38300	31100
			36933.3
			Caluclated Value
			0.977437	0.90704
			0.98556	0.725632
			1.037	0.842058
