# Supplementary material for: Glutathione de novo synthesis but not recycling process coordinates with glutamine catabolism to control redox homeostasis and directs murine T cell differentiation
Source: eLife journal article supplement (doi:10.7554/elife.36158), 2018-09-10
Supplement: supp [file elife-36158-supp-v1.zip › elife_poa_e36158_Figure_3_source_data_1.xlsx]

## Sheet: Fig3G
	Clinical score
	Days	WT					Gclm KO
	1	0	0	0	0	0	0	0	0	0	0
	2	0	0	0	0	0	0	0	0	0	0
	3	0	0	0	0	0	0	0	0	0	0
	4	0	0	0	0	0	0	0	0	0	0
	5	0	0	0	0	0	0	0	0	0	0
	6	0	0	0	0	0	0	0	0	0	0
	7	0	0	0	0	0	0	0	0	0	0
	8	0	0	0	0	0	0	0	0	0	0
	9	0	0	0	0	0	0	0	0	0	0
	10	0	0	0	0	0	0	0	0	0	0
	11	0	0	0	0	0	0	0	0	0	0
	12	0	0	0	1	1	0	0	0	0	0
	13	1	0	0	2	3	0	0	0	0	0
	14	1	0	0	4	4	0	0	0	0	0
	15	2	0	1	4	4	0	0	0	0	0
	16	4	1	2	4	4	0	0	0	0	0
	17	4	1	3	4	4	0	0	0	0	0
	18	4	1	3	4	4	0	0	0	0	0
	19	4	2	3	4	4	0	0	0	0	0
	20	4	2	4	4	4	0	0	0	0	0
	21	4	3	4	4	4	0	0	0	0	0
	22	4	3	4	4	4	0	0	0	0	0
	23	4	4	4	4	4	0	0	0	0	0
	24	4	4	4	4	4	0	0	0	0	0
	25	4	4	4	4	4	0	0	0	0	0
	26	4	4	4	4	4	0	0	0	0	0
	27	4	4	4	4	4	0	0	0	0	0
	28	4	4	4	4	4	0	0	0	0	0
	n=5 per group

## Sheet: Fig3H
	Clinical score
	Days	WT				Gclc KO
	0	0	0	0	0	0	0	0	0
	1	0	0	0	0	0	0	0	0
	2	0	0	0	0	0	0	0	0
	3	0	0	0	0	0	0	0	0
	4	0	0	0	0	0	0	0	0
	5	0	0	0	0	0	0	0	0
	6	0	0	0	0	0	0	0	0
	7	0	0	0	0	0	0	0	0
	8	0	1	1	1	0	0	0	0
	9	1	2	2	1	0	0	0	0
	10	1	2	2	1	0	0	0	0
	11	1	2	2	1	0	0	0	0
	12	2	3	3	2	0	0	0	0
	13	2	3	3	4	0	0	0	0
	14	3	4	4	4	0	0	0	0
	15	3	4	4	4	0	0	0	0
	16	4	4	4	4	0	0	0	0
	17	4	4	4	4	0	0	0	0
	18	4	4	4	4	0	0	0	0
	19	4	4	4	4	0	0	0	0
	20	4	4	4	4	0	0	0	0
	21	4	4	4	4	0	0	0	0
	22	4	4	4	4	0	0	0	0
	23	4	4	4	4	0	0	0	0
	24	4	4	4	4	0	0	0	0
	25	4	4	4	4	0	0	0	0
	26	4	4	4	4	0	0	0	0
	27	4	4	4	4	0	0	0	0
	28	4	4	4	4	0	0	0	0
	29	4	4	4	4	0	0	0	0
	n=5 per group
