# Supplementary material for: Glutathione de novo synthesis but not recycling process coordinates with glutamine catabolism to control redox homeostasis and directs murine T cell differentiation
Source: eLife journal article supplement (doi:10.7554/elife.36158), 2018-09-10
Supplement: supp [file elife-36158-supp-v1.zip › elife_poa_e36158_Figure_4_figure_supplement_1.pdf]

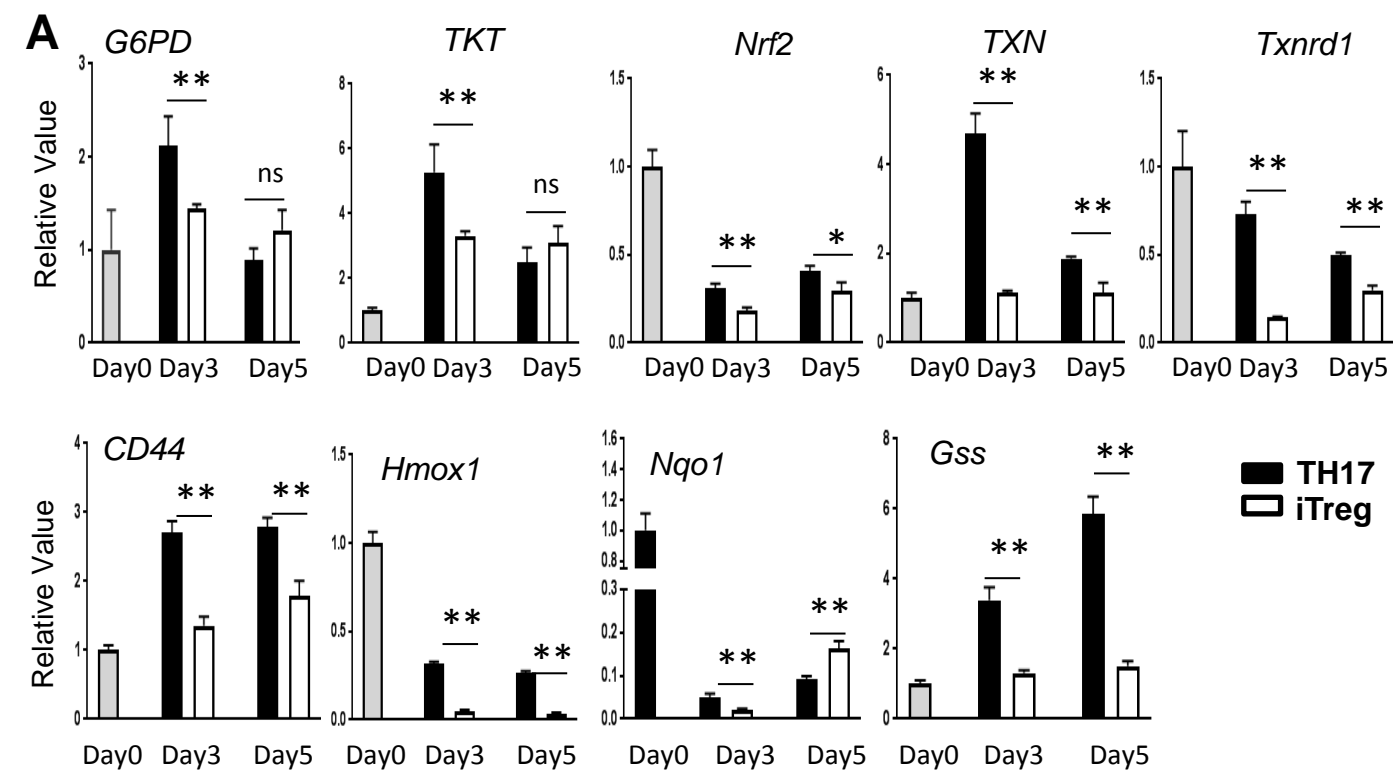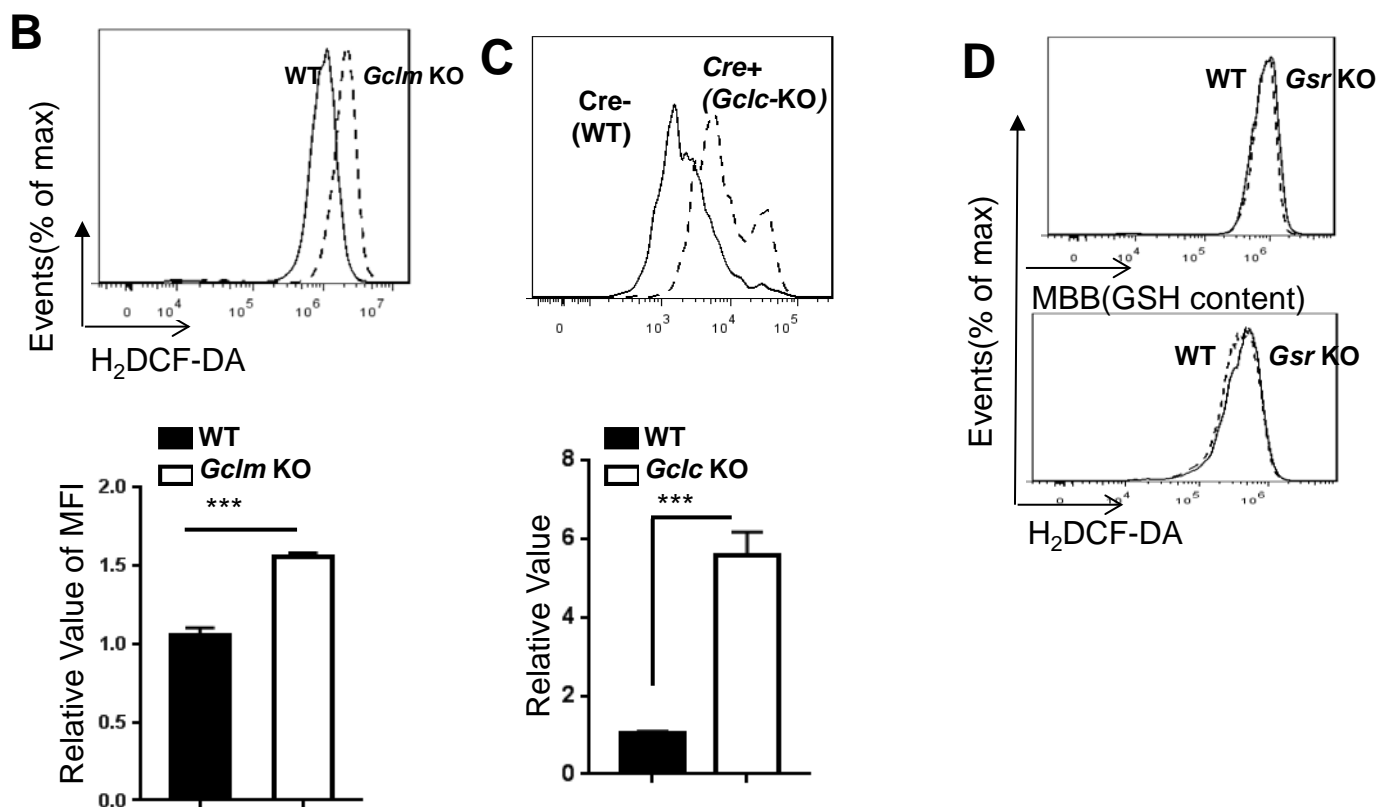

**Figure 4—figure supplement 1 . De novo synthesis but not recycling of GSSG is required for providing GSH and suppressing ROS during T<sub>H</sub>17 cell differentiation.**
