# Supplementary material for: Glutathione de novo synthesis but not recycling process coordinates with glutamine catabolism to control redox homeostasis and directs murine T cell differentiation
Source: eLife journal article supplement (doi:10.7554/elife.36158), 2018-09-10
Supplement: supp [file elife-36158-supp-v1.zip › elife_poa_e36158_Figure_4_figure_supplement_1_source_data_1.xlsx]

## Sheet: S4A
Original CT value
		tub	G6PD	TKT	Nrf2	Txn	Txnrd1	CD44	Hmox1	Nqo1	GSS
	Naïve T	19.3574	25.2871	24.7856	23.6405	23.6898	22.4703	24.0366	25.217	24.0247	27.8242
		19.4869	26.3752	24.7147	23.5439	23.9928	22.9427	23.9346	25.2643	23.7818	28.0661
		19.3178	26.3223	24.9275	23.7555	23.8651	22.9592	23.9812	25.2181	23.9965	28.0034
	Th17 day3	17.7922	23.4908	20.7572	23.8311	19.8821	21.7056	20.9863	25.3048	26.4198	24.4078
		17.7689	23.2678	21.009	23.6634	20.1238	21.4582	20.8901	25.2417	26.8631	24.7018
		17.692	23.0692	20.5548	23.6125	19.9374	21.6552	20.8543	25.2385	26.5402	24.5855
	iTreg day3	17.191	23.2812	20.8662	24.0282	21.4639	23.4527	21.2599	27.1794	27.1664	25.4662
		17.1922	23.3145	20.882	23.9029	21.5674	23.3949	21.5191	27.3343	27.3217	25.32
		17.2462	23.2556	20.9611	23.7797	21.4961	23.3915	21.3292	27.4806	27.2248	25.3903
	Th17 day5	18.3014	25.2843	22.5541	23.8327	21.8297	22.7021	21.3344	26.0296	26.3657	24.4385
		18.2455	24.8912	22.0878	23.7382	21.8585	22.6595	21.4484	26.1216	26.2375	24.3086
		18.3049	25.0082	22.5186	23.9596	21.8169	22.7336	21.4192	26.0087	26.1806	24.1967
	iTreg day5	18.092	24.2008	22.0264	24.2675	22.2324	23.1431	21.9093	28.9112	25.1616	26.0417
		18.1183	24.6199	21.6221	23.9759	22.1325	23.1907	21.8066	28.7823	25.3022	25.9573
		17.8807	24.2676	21.8126	23.8907	22.588	23.2011	21.6583	28.4239	25.1347	26.0452
2Exp(-Delta Delta Ct)
		tub	G6PD	TKT	Nrf2	Txn	Txnrd1	CD44	Hmox1	Nqo1	GSS
Naïve T			1	1	1	1	1	1	1	1	1
Th17 day3			2.11787	5.27523	0.309489	4.69728	0.731067	2.70865	0.315368	0.0504271	3.39445
iTreg day3			1.4475	3.31393	0.184986	1.11926	0.143604	1.35397	0.0516205	0.0223925	1.31477
Th17 day5			0.888972	2.49488	0.406043	1.88003	0.496176	2.78962	0.263589	0.092761	5.84218
iTreg day5			1.21006	3.09902	0.296257	1.1286	0.298418	1.78473	0.0351645	0.162422	1.50812
STDEV
	tub		G6PD	TKT	Nrf2	Txn	Txnrd1	CD44	Hmox1	Nqo1	GSS
Naïve T			0.429642	0.096965	0.0956687	0.121969	0.201958	0.0707907	0.0641014	0.110636	0.106434
Th17 day3			0.319054	0.853875	0.0269912	0.446267	0.0713874	0.16156	0.0140745	0.00821801	0.369584
iTreg day3			0.0433197	0.137473	0.016439	0.0478134	0.00464462	0.129382	0.00550619	0.00131242	0.0725925
Th17 day5			0.126047	0.45255	0.0326334	0.0515135	0.0171689	0.131326	0.0125547	0.00646139	0.508184
iTreg day5			0.218193	0.516691	0.0485951	0.213217	0.0276858	0.224296	0.00692529	0.0178201	0.145717

## Sheet: S4B
		Original MFI
		WT	Gclm KO
		1310000	1980000
		1380000	1920000
		1250000	1910000
		1.31333e+06
		Calculated value
		0.997462	1.50761
		1.05076	1.46193
		0.951777	1.45432

## Sheet: S4C
			Original MFI
			WT	Gclc Ko
			2210	11200
			2316	13200
			2109	10896
			2211.67
			Calculated value
			0.999246	5.06405
			1.04717	5.96835
			0.953579	4.9266
