# Supplementary material for: Glutathione de novo synthesis but not recycling process coordinates with glutamine catabolism to control redox homeostasis and directs murine T cell differentiation
Source: eLife journal article supplement (doi:10.7554/elife.36158), 2018-09-10
Supplement: supp [file elife-36158-supp-v1.zip › elife_poa_e36158_Figure_4_source_data_1.xlsx]

## Sheet: Fig A
		Day 3			Day 5
		Original MFI			Original MFI
		TH17	iTreg		TH17	iTreg
		22885	17492		65660	42190
		24108	16011		67190	40080
		21995	15786		68230	38450
		22996			67026.7
		Calculated Value			Calculated Value
		0.995173	0.760654		0.97961	0.629451
		1.04836	0.696252		1.00244	0.597971
		0.956471	0.686467		1.01795	0.573652

## Sheet: Fig B
			Day 3			Day 5
			Original MFI			Original MFI
			TH17	iTreg		TH17	iTreg
			18342	24536		64325	89235
			17235	25172		63452	87234
			17943	23541		62231	87124
			17840			63336
			Calculated Value			Calculated Value
			1.02814	1.37534		1.02099	1.41637
			0.966087	1.41099		1.00713	1.38461
			1.00577	1.31956		0.987752	1.38286

## Sheet: Fig C
	(Concentration (pmol/106 cells))Quantitative Estimation of Target Metabolites
	Metabolite	KEGG ID	HMDB ID
				Th17		iTreg
	Glutathione (GSH)	C00051	HMDB00125	709.457	742.984	270.41	255.647
	Glutathione (GSSG)_divalent	C00127	HMDB03337	228.188	219.355	122.923	131.344

## Sheet: Fig D
					Original MFI			Original MFI
					WT	Gclc-KO		WT	Gclm-KO
					203246	64503		76324	62136
					180118	79306		74098	60568
					219006	50039		78135	61489
					200790			76185.7
					Calculated Value			Calculated Value
					1.01223	0.321246		1.00217	0.815875
					0.897047	0.39497		0.972942	0.795287
					1.09072	0.249211		1.02595	0.80738
