# Supplementary material for: Glutathione de novo synthesis but not recycling process coordinates with glutamine catabolism to control redox homeostasis and directs murine T cell differentiation
Source: eLife journal article supplement (doi:10.7554/elife.36158), 2018-09-10
Supplement: supp [file elife-36158-supp-v1.zip › elife_poa_e36158_Figure_5_figure_supplement_1.pdf]

**A**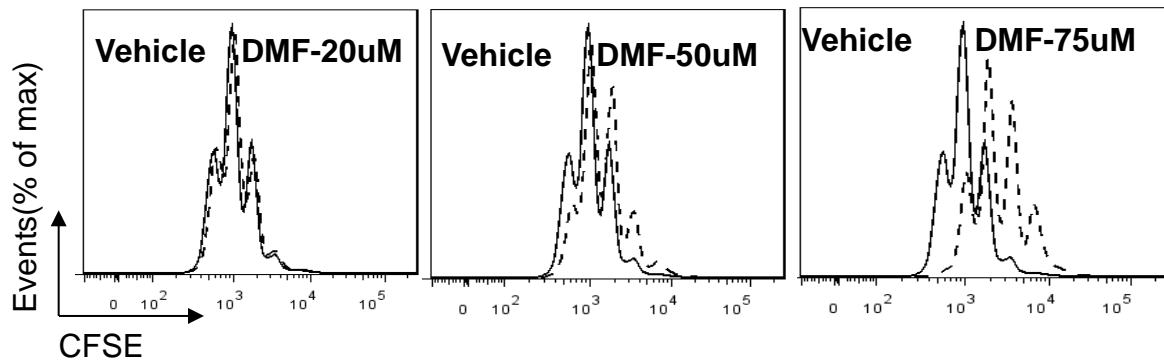**B**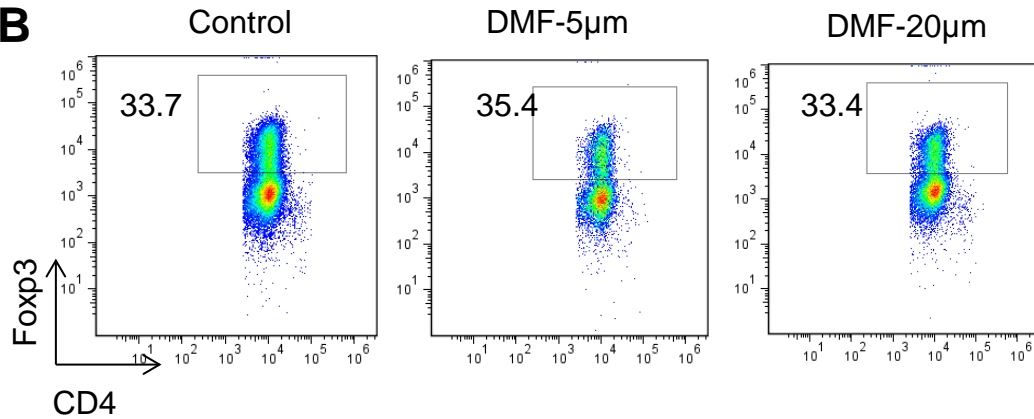

**Figure 5—figure supplement 1 .DMF suppresses T<sub>H</sub>17 differentiation through augmenting ROS generation.**
