# Supplementary material for: Glutathione de novo synthesis but not recycling process coordinates with glutamine catabolism to control redox homeostasis and directs murine T cell differentiation
Source: eLife journal article supplement (doi:10.7554/elife.36158), 2018-09-10
Supplement: supp [file elife-36158-supp-v1.zip › elife_poa_e36158_Figure_5_source_data_1.xlsx]

## Sheet: Fig D
	Original MFI
DMF	0 um	5 um	20 um
	9195	18348	20883
	8801	16737	21106
	9423	18961	19689
	9139.67
	Calculated Value
	1.00605	2.00751	2.28488
	0.962945	1.83125	2.30927
	1.031	2.07458	2.15424
