# Supplementary material for: Glutathione de novo synthesis but not recycling process coordinates with glutamine catabolism to control redox homeostasis and directs murine T cell differentiation
Source: eLife journal article supplement (doi:10.7554/elife.36158), 2018-09-10
Supplement: supp [file elife-36158-supp-v1.zip › elife_poa_e36158_Figure_6_figure_supplement_1_source_data_1.xlsx]

## Sheet: S6A
			Original MFI
			Complete	1hr	2hr	6hr
			11900	11900	36800	31500
			11800	12100	36900	30500
			11100	11700	37100	30510
			11600	11900	36933.3	30836.7
			Calculated Value
			1.02586	1.02586	0.684015	0.438108
			1.01724	1.0431	0.685874	0.4242
			0.956897	1.00862	0.689591	0.424339

## Sheet: S6B
		Original Ct value
			tub	Slc3a2	CAD	GFPT1	Pfas	PPAT	GLs	Gls2	GOT1	GOT2	ME2
		TH17	18.8754	30.9667	25.9622	26.0502	29.7086	25.3229	25.3254	27.1192	23.2175	21.6309	26.2373
			18.8328	30.3466	25.9727	25.9603	29.6397	25.3188	25.4276	26.9952	23.3499	21.6702	26.0339
			18.7437	29.71	25.9422	25.9988	29.7184	25.1588	25.2214	27.0818	23.3098	21.5568	26.0391
		iTreg	18.1542	31.6079	25.4316	26.6477	29.9178	24.9441	25.7277	28.146	23.966	21.746	26.3111
			18.2562	31.4572	25.5071	26.6249	30.1876	24.99	25.6132	27.995	23.9599	21.8596	26.2475
			18.3132	31.4604	25.3978	26.6755	29.9325	24.9359	25.5771	28.1497	23.9964	21.8843	26.2465
		2Exp(-Delta Delta Ct)
			TH17	1	1	1	1	1	1	1	1	1	1
			iTreg	0.298644	0.957543	0.428574	0.535935	0.831639	0.539367	0.328137	0.418174	0.579633	0.598297
		STDEV
			TH17	0.438037	0.0478188	0.0561046	0.0552718	0.0798813	0.0853281	0.0641654	0.0662183	0.0613399	0.0929123
			iTreg	0.0243987	0.0650921	0.0250804	0.0638086	0.0493619	0.0420676	0.0271714	0.0240223	0.0438774	0.0367492

## Sheet: S6C
	Original CT value
		actin	Gclm	Gclc	GSR
	Th17	17.79	23.2271	24.18	22.9992
		17.77	23.2803	24.21	22.8625
		17.69	23.3632	24.22	23.0356
	iTreg	17.19	23.7964	24.43	24.758
		17.19	24.1161	24.45	24.8653
		17.25	23.943	24.75	24.9488
	2Exp(-Delta Delta Ct)
			Gclm	Gclc	GSR
	Th17		1	1	1
	iTreg		0.434795	0.543367	0.18536
	STDEV
			Gclm	Gclc	GSR
	Th17		0.0600612	0.039414	0.0731292
	iTreg		0.0493447	0.0687636	0.0130677

## Sheet: S6E
		Original MFI
		complete	DON-30	BPTES	CB-839
		980000	2360000	804000	689000
		950000	2230000	800000	678000
		1040000	2430000	817000	685000
		990000	2340000	807000	684000
		Calculated value
		0.989899	2.38384	0.812121	0.69596
		0.959596	2.25253	0.808081	0.684848
		1.05051	2.45455	0.825253	0.691919

## Sheet: S6G
		Original MFI
		q+	q-	HT	NAC	HT+NAC
		173600	236500	236000	129000	168000
		172000	235500	213000	137000	169000
		196000	214000	189000	125000	126000
		180533	228667	212667	130333	154333
		Calculated value
		0.961597	1.31001	1.30724	0.714551	0.930578
		0.952734	1.30447	1.17984	0.758864	0.936117
		1.08567	1.18538	1.0469	0.692394	0.697933
