# Supplementary material for: Glutathione de novo synthesis but not recycling process coordinates with glutamine catabolism to control redox homeostasis and directs murine T cell differentiation
Source: eLife journal article supplement (doi:10.7554/elife.36158), 2018-09-10
Supplement: supp [file elife-36158-supp-v1.zip › elife_poa_e36158_Figure_6_figure_supplement_2.pdf]

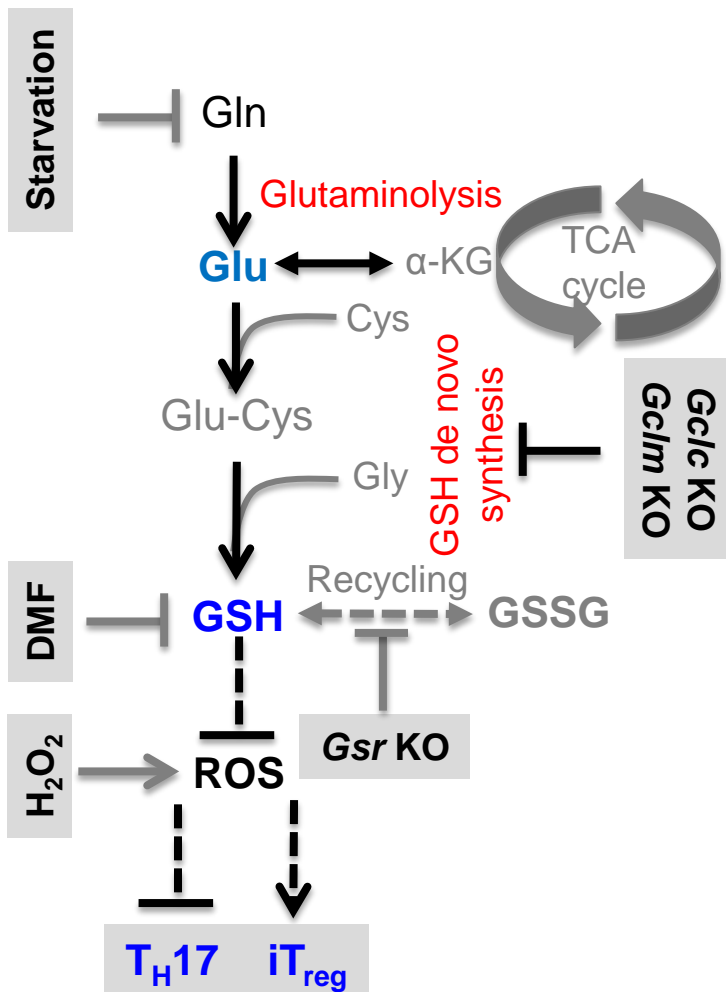

**Figure 6—figure supplement 2 . Glutamine catabolism coordinates with GSH metabolism in modulating ROS homeostasis and T cell differentiation.**
