# Supplementary material for: Glutathione de novo synthesis but not recycling process coordinates with glutamine catabolism to control redox homeostasis and directs murine T cell differentiation
Source: eLife journal article supplement (doi:10.7554/elife.36158), 2018-09-10
Supplement: supp [file elife-36158-supp-v1.zip › elife_poa_e36158_Figure_6_source_data_1.xlsx]

## Sheet: Fig 6B
	Fractions
			Th17			iTreg
		Glutamate	0.157231	0.172762	0.159431	0.133616	0.108098	0.114392
		GSH	0.342021	0.372117	0.346223	0.350693	0.337665	0.351905
	umol/g		Th17			iTreg
		Glutamate	4.7346	5.37107	3.11069	1.75039	0.779994	1.58325
		GSH	9.83465	11.3997	6.20908	2.09984	0.96915	2.03086

## Sheet: Fig 6C
	Glutaminolysis			TCA
	TH17	iTreg		TH17	iTreg
	7519	4413		3914	5260
	7235	4676		4239	4016
	7340	4837		3815	4726
	7364.67			3989.33
	1.02096	0.599212		0.981116	1.31852
	0.982393	0.634923		1.06258	1.00668
	0.996651	0.656785		0.9563	1.18466

## Sheet: Fig 6G
	Original MFI
		q-	q+	a-KG	HT
		954000	728000	957000	973000
		963000	729000	1050000	978000
		999000	712000	901000	992000
		972000	723000	969333	981000
	Calculated value
		0.981481	0.748971	0.984568	1.00103
		0.990741	0.75	1.08025	1.00617
		1.02778	0.73251	0.926955	1.02058
