# Supplementary material for: Glutathione de novo synthesis but not recycling process coordinates with glutamine catabolism to control redox homeostasis and directs murine T cell differentiation
Source: eLife journal article supplement (doi:10.7554/elife.36158), 2018-09-10
Supplement: supp [file elife-36158-supp-v1.zip › elife_poa_e36158_Supplementary_File_1.xlsx]

## Sheet: Sheet1
	GenebankAccession#	Gene name	Primer-forward	Primer-reverse
	NM_009735	Beta2 microglobulin	TTCTGGTGCTTGTCTCACTGA	CAGTATGTTCGGCTTCCCATTC
	NM_001161413	SLC3a2	TGATGAATGCACCCTTGTACTTG	TCCCCAGTGAAAGTGGA
	NM_145494	ME2	AAGGGAATGGCGTTTACGTTAC	GTACACAATCGGCATCAGACTT
	NM_023525	CAD	CTGCCCGGATTGATTGATGTC	GGTATTAGGCATAGCACAAACCA
	NM_010325	GOT2	TGGGCGAGAACAATGAAGTGT	CCCAGGATGGTTTGGGCAG
	NM_001081081	Gls	GGGAATTCACTTTTGTCACGA	GACTTCACCCTTTGATCACC
	NM_001033264	Gls2	AGCGTATCCCTATCCACAAGTTCA	GCAGTCCAGTGGCCTTCAGAG
	NM_013528	GFPT1	GAAGCCAACGCCTGCAAAATC	CCAACGGGTATGAGCTATTCC
	NM_172146.2	PPAT	GCGAGGAATGTGGTGTGTTTG	TTTAGGCACTGCACTCCCATC
	NM_010324	GOT1	GAGCGTACCGCACAGATGAAT	GGCTGTTGTCGTTAGCAATCTT
	NM_010325	G6PD	CACAGTGGACGACATCCGAAA	AGCTACATAGGAATTACGGGCAA
	NM_009388	TKT	ATGGAAGGTTACCATAAGCCAGA	TGCAGCATGATGTGGGGTG
	NM_010902	Nrf2	CTTTAGTCAGCGACAGAAGGAC	AGGCATCTTGTTTGGGAATGTG
	NM_011990	TXN1	CATGCCGACCTTCCAGTTTTA	TTTCCTTGTTAGCACCGGAGA
	NM_001042523	Txnrd1	GGGTCCTATGACTTCGACCTG	AGTCGGTGTGACAAAATCCAAG
	NM_001039151	CD44	TCGATTTGAATGTAACCTGCCG	CAGTCCGGGAGATACTGTAGC
	NM_010442	Hmox1	AGGTACACATCCAAGCCGAGA	CATCACCAGCTTAAAGCCTTCT
	NM_008706	Nqo1	AGGATGGGAGGTACTCGAATC	TGCTAGAGATGACTCGGAAGG
	NM_008180	GSS	CAAAGCAGGCCATAGACAGGG	AAAAGCGTGAATGGGGCATAC
	NM_145494	ME2	AAGGGAATGGCGTTTACGTTAC	GTACACAATCGGCATCAGACTT
	NM_010295	GCLC	ACTAGGCTGTCCTGGATTCA	TTGCCCATCCCGAATCCCA
	NM_008129	GCLM	AGGAGCTTCGGGACTGTATCC	GGGACATGGTGCATTCCAAAA
	NM-010344	GSR	GCGTGAATGTTGGATGTGTACC	GTTGCATAGCCGTGGATAATTTC
